# Supplementary material for: The influence of push-off timing in a robotic ankle-foot prosthesis on the energetics and mechanics of walking
Source: PubMed Central journal article supplement (PMC4404655; doi:10.1186/s12984-015-0014-8), 2015-02-22

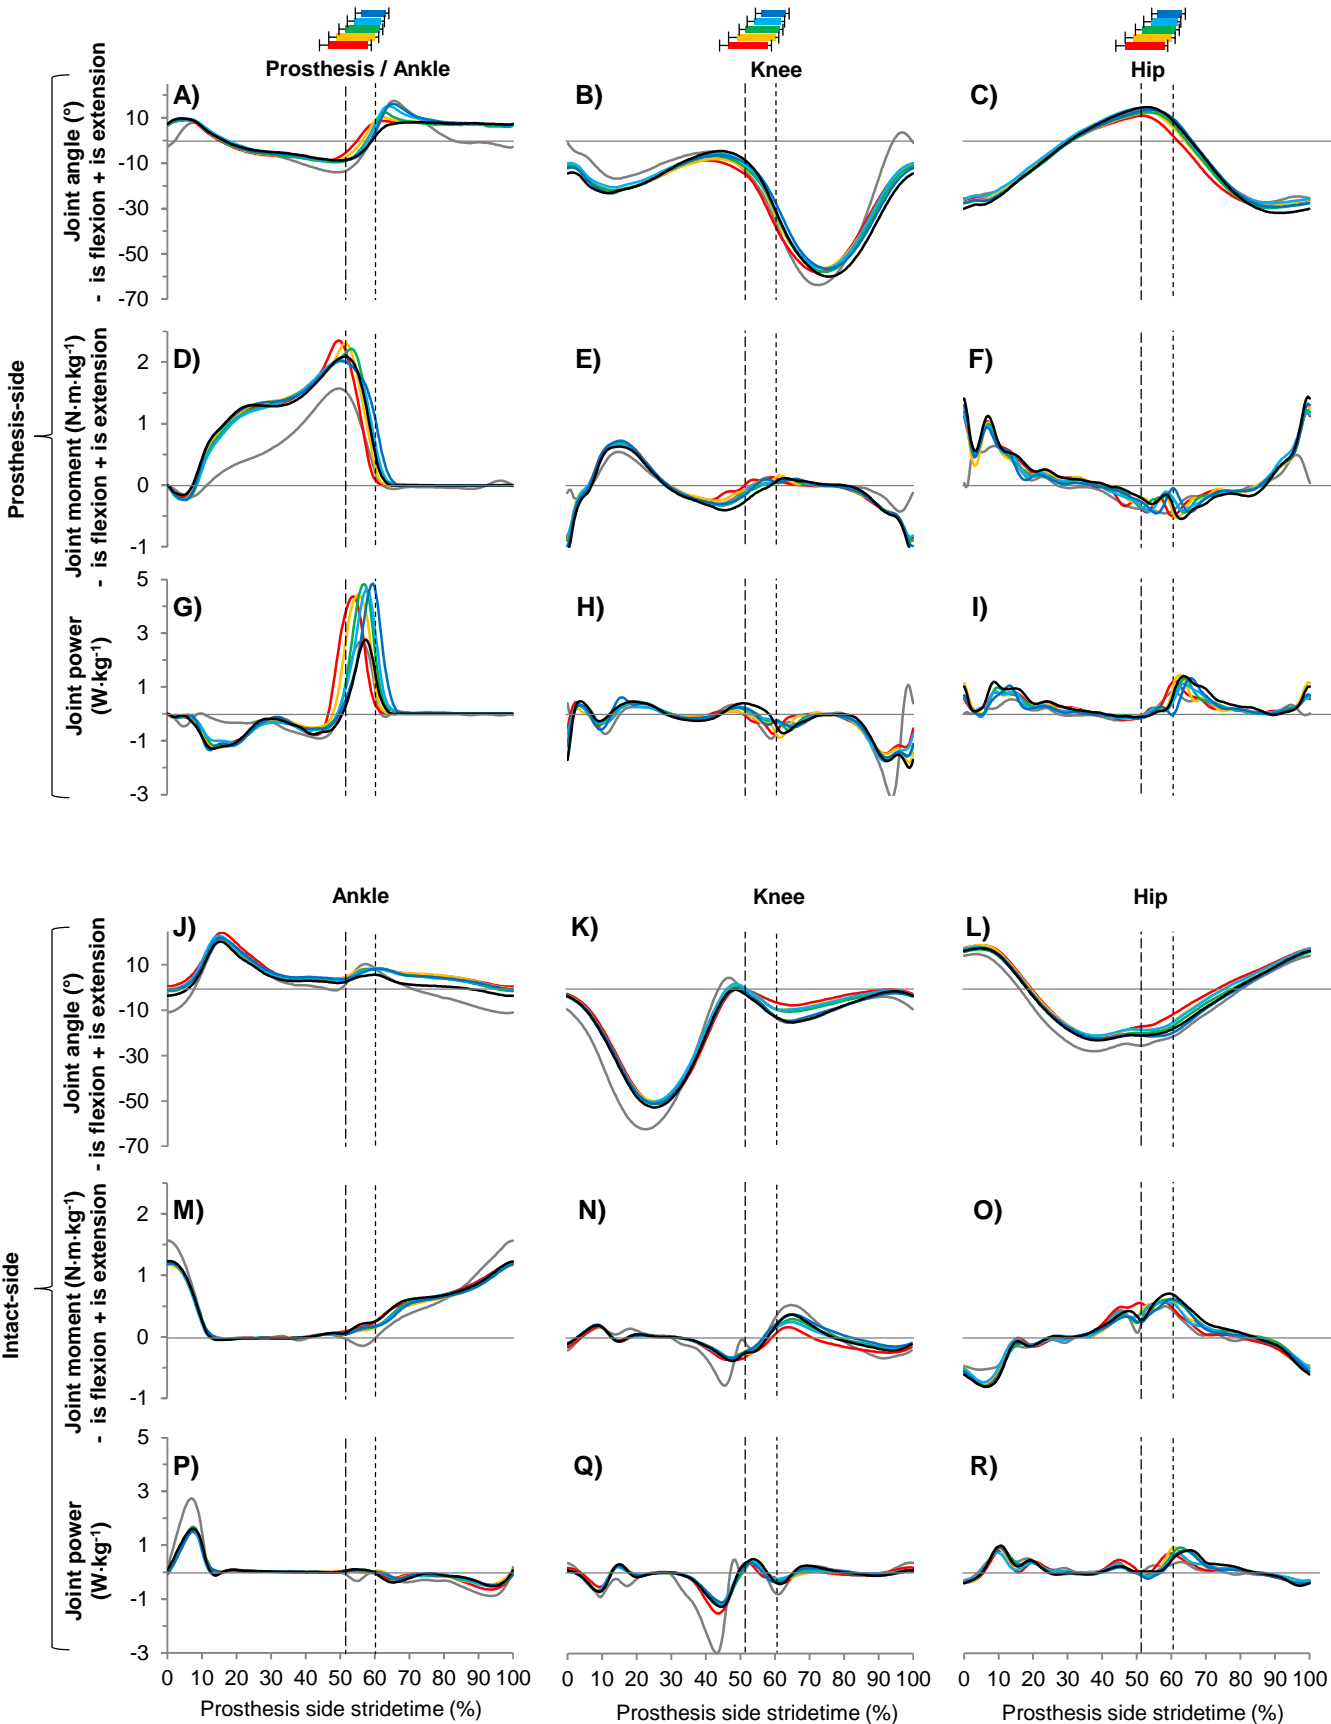

Supplement: 12984_2015_14_MOESM4_ESM.pdf [file 12984_2015_14_MOESM4_ESM.pdf]
