# Supplementary material for: The influence of push-off timing in a robotic ankle-foot prosthesis on the energetics and mechanics of walking
Source: PubMed Central journal article supplement (PMC4404655; doi:10.1186/s12984-015-0014-8), 2015-02-22

**Perceived assistance**  
+ is assistive  
- is perturbing  
compared to Spring-like condition

p timing =  $3 \cdot 10^{-4}$

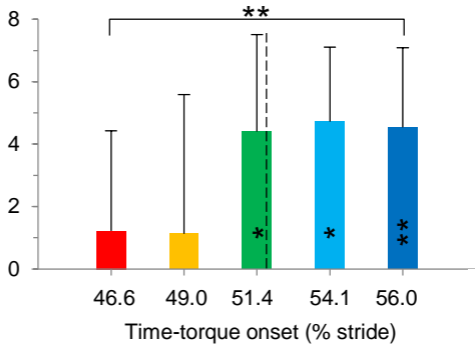

Supplement: 12984_2015_14_MOESM5_ESM.pdf [file 12984_2015_14_MOESM5_ESM.pdf]
