# Supplementary material for: The influence of push-off timing in a robotic ankle-foot prosthesis on the energetics and mechanics of walking
Source: Springer Nature journal article supplement (doi:10.1186/s12984-015-0014-8), 2015-02-21

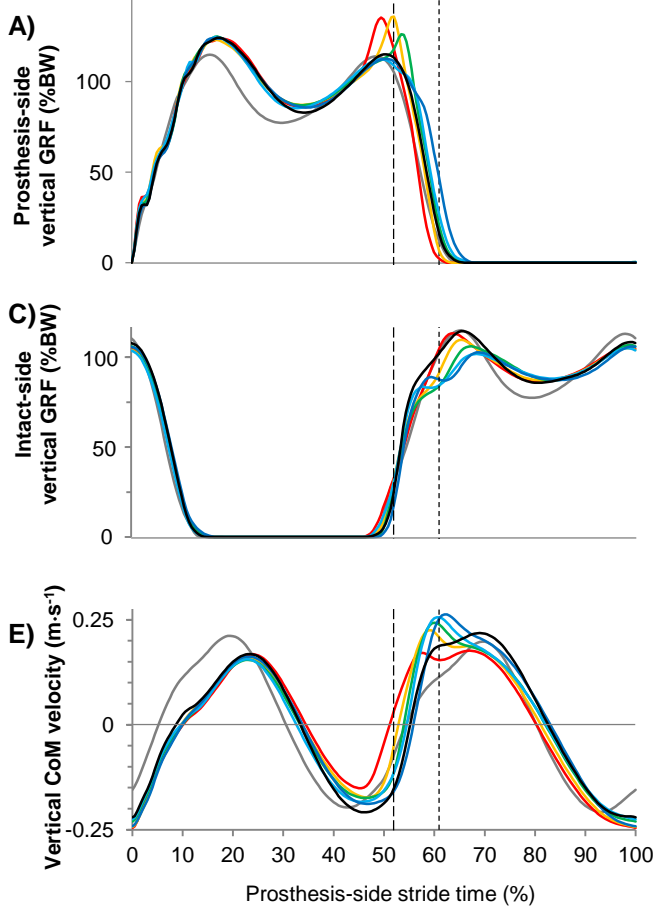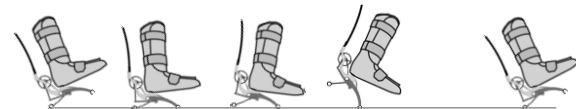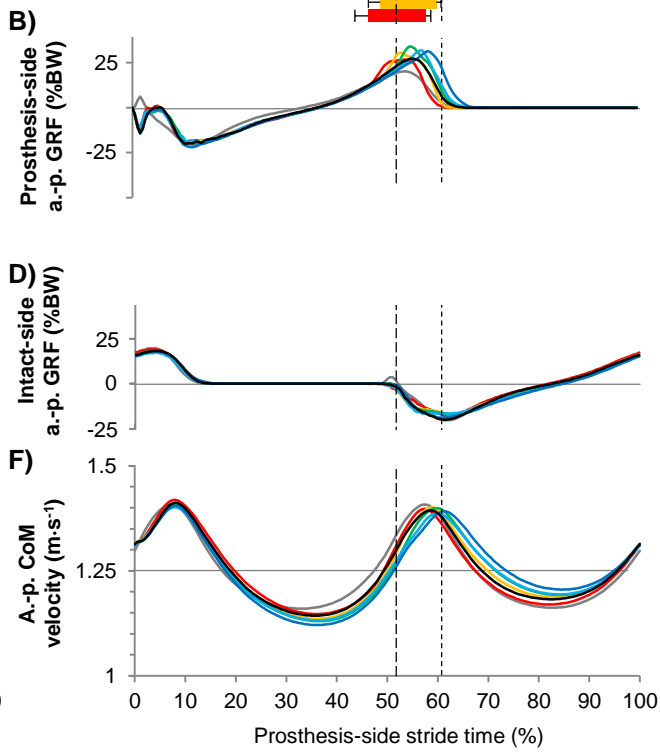

Supplement: MOESM2 [file 9769706]
